# Supplementary material
Source: publisher figshare collection journal article supplement (https://future-science-group.figshare.com/articles/dataset/_/22591669)
Supplement: Supplementary file 1 [file 1]

Table S1 Cumulative amount of drug released at pH=6.8 (mean ± S.E.M, n=3)

| Sample  Time | Quercetin powder | Nanocrystal (F3) | Nanocrystal (F4) | Physical mixture  (Quercetin + F127) | Physical mixture  (Quercetin + F68) |
| --- | --- | --- | --- | --- | --- |
| 0 | 0 | 0 | 0 | 0 | 0 |
| 10 | 32.37 ± 1.24 | 65.16 ± 4.41 | 73.98 ± 0.24 | 34.00 ± 1.27 | 32.81 ± 1.19 |
| 20 | 38.31 ± 1.17 | 71.81 ± 2.13 | 76.18 ± 0.77 | 38.74 ± 1.09 | 38.60 ± 0.94 |
| 30 | 41.17 ± 0.60 | 71.38 ± 2.05 | 75.76 ± 0.58 | 41.66 ± 0.97 | 41.13 ± 0.76 |
| 45 | 43.64 ± 0.50 | 73.55 ± 0.24 | 77.12 ± 0.55 | 43.43 ± 0.71 | 43.28 ± 0.57 |
| 60 | 45.24 ± 0.41 | 74.02 ± 0.23 | 77.55 ± 0.67 | 45.21 ± 1.49 | 44.75 ± 0.93 |
| 90 | 47.48 ± 0.69 | 74.40 ± 0.14 | 79.17 ± 1.31 | 47.57 ± 1.09 | 47.31 ± 0.59 |
| 120 | 49.14 ± 0.84 | 75.91 ± 0.29 | 80.57 ± 1.83 | 49.33 ± 0.44 | 48.09 ± 0.34 |
| 180 | 51.28 ± 1.12 | 77.59 ± 0.57 | 80.39 ± 0.72 | 50.77 ± 0.57 | 48.89 ± 0.70 |
| 240 | 53.19 ± 1.81 | 78.45 ± 0.23 | 81.65 ± 0.74 | 51.57 ± 0.84 | 50.59 ± 0.56 |

Table S2 Cumulative amount of drug released at pH=1.2 (mean ± S.E.M, n=3).

| Sample  Time | Quercetin powder | Nanocrystal (F3) | Nanocrystal (F4) | Physical mixture  (Quercetin + F127) | Physical mixture  (Quercetin + F68) |
| --- | --- | --- | --- | --- | --- |
| 0 | 0 | 0 | 0 | 0 | 0 |
| 10 | 30.24 ± 1.34 | 60.92 ± 2.20 | 61.95 ± 0.97 | 31.57 ± 0.65 | 30.09 ± 0.91 |
| 20 | 36.31 ± 0.74 | 62.39 ± 1.23 | 65.34 ± 1.30 | 36.75 ± 1.28 | 36.19 ± 0.61 |
| 30 | 39.55 ± 0.60 | 63.88 ± 0.07 | 67.66 ± 1.88 | 41.35 ± 0.61 | 39.89 ± 1.03 |
| 45 | 42.24 ± 0.68 | 67.71 ± 0.99 | 68.90 ± 2.02 | 44.55 ± 0.50 | 43.26 ± 0.95 |
| 60 | 44.35 ± 0.60 | 69.26 ± 1.06 | 69.64 ± 0.71 | 46.56 ± 0.58 | 45.21 ± 0.49 |
| 90 | 46.50 ± 1.21 | 71.61 ± 0.56 | 71.21 ± 1.12 | 48.95 ± 1.07 | 49.08 ± 0.73 |
| 120 | 49.00 ± 0.20 | 73.19 ± 0.43 | 72.37 ± 1.69 | 51.49 ± 0.52 | 51.36 ± 0.19 |
